# Supplementary material for: Contamination Status, Environmental Factor and Risk Assessment of Polychlorinated Biphenyls and Hexachlorobutadiene in Greenhouse and Open-Field Agricultural Soils across China
Source: MDPI journal article supplement (doi:10.3390/toxics11110941), 2023-11-20
Supplement: s1 [file s1]

# Supplementary Materials: Contamination Status, Environmental Factor and Risk Assessment of Polychlorinated Biphenyls and Hexachlorobutadiene in Greenhouse and Open-Field Agricultural Soils across China

Yaru Li, Fangwei Hou, Rongguang Shi, Xiaohua Li, Jing Lan and Zongshan Zhao

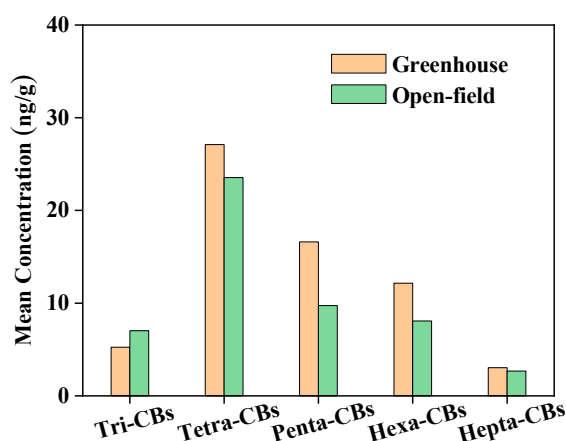

**Figure S1.** The mean concentrations of PCBs congeners in greenhouse and open-field soils.



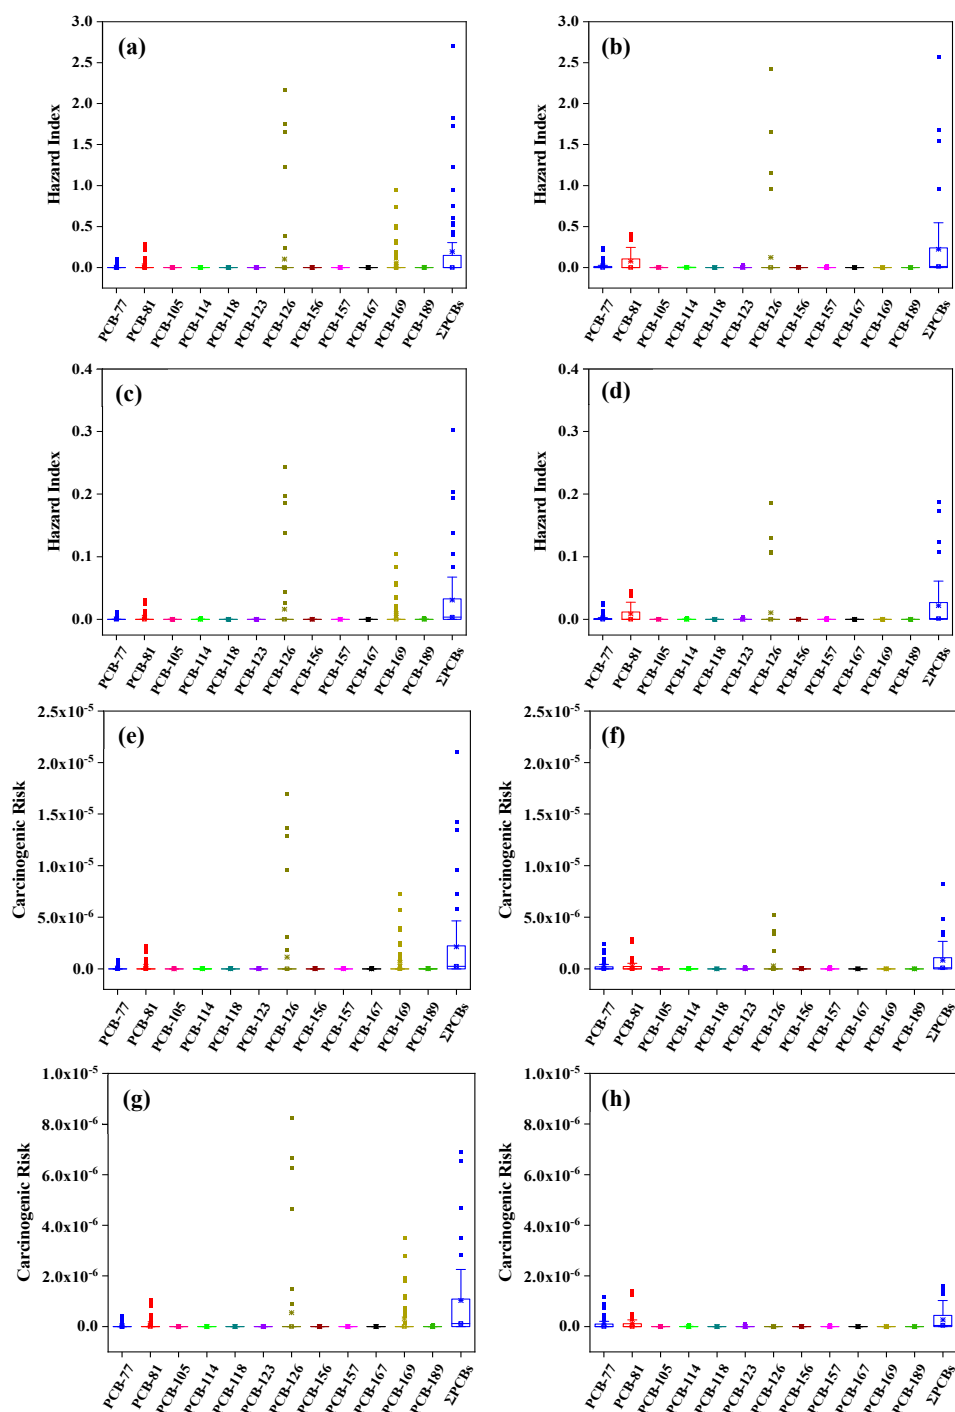

**Figure S3.** The health risks of PCBs to adults and children: (a) Non-cancer risks of PCBs to children in open-field soils; (b) Non-cancer risks of PCBs to adult in open-field soils; (c) Non-cancer risks of PCBs to children in greenhouse soils; (d) Non-cancer risks of PCBs to adult in greenhouse soils; (e) Carcinogenic risks of PCBs to children in greenhouse soils; (f) Carcinogenic risks of PCBs to children in open-field soils; (g) Carcinogenic risks of PCBs to adult in greenhouse soils; (h) Carcinogenic risks of PCBs to adult in open-field soils.

**Table S1.** Locations and crops cultivation of the sampling sites in this study.

| Region             | Province/Municipality/<br>Autonomous region | City   | GPS location                | Crop cultivation | Cultivation age | Main fertilizer | Soil type |
|--------------------|---------------------------------------------|--------|-----------------------------|------------------|-----------------|-----------------|-----------|
| Northeastern China | Heilongjiang (HLJ)                          | Harbin | N 45°46'19"<br>E 126°47'37" | cucumber         | 2               | organic         | black     |

|                   |                        |              |                             |            |   |          |       |
|-------------------|------------------------|--------------|-----------------------------|------------|---|----------|-------|
| Northern<br>China | Jilin<br>(JL)          | Changchun    | N 45°38'7"<br>E 126°47'1"   | cucumber   | 2 | organic  | black |
|                   |                        |              | N 43°44'7"<br>E 125°22'20"  | cabbage    | 2 | chemical | black |
|                   |                        |              | N 43°45'28"<br>E 125°20'58" | cabbage    | 2 | chemical | black |
|                   |                        |              | N 43°45'28"<br>E 125°20'58" | cabbage    | 2 | chemical | black |
|                   |                        |              | N 39°13'8"<br>E 121°43'44"  | bean       | 3 | chemical | brown |
|                   |                        |              | N 39°14'1"<br>E 121°43'28"  | bean       | 3 | chemical | brown |
|                   | Beijing<br>(BJ)        | Beijing      | N 40°02'25"<br>E 116°41'48" | leek       | 3 | organic  | brown |
|                   |                        |              | N 39°44'2"<br>E 116°22'40"  | leek       | 3 | organic  | brown |
|                   |                        |              | N 39°57'40"<br>E 116°19'33" | leek       | 3 | organic  | brown |
|                   |                        |              | N 37°44'32"<br>E 112°31'49" | cabbage    | 2 | chemical | brown |
|                   |                        |              | N 39°56'36"<br>E 116°15'34" | cabbage    | 2 | chemical | brown |
|                   |                        |              | N 37°41'59"<br>E 112°32'30" | cabbage    | 2 | chemical | brown |
|                   | Shanxi<br>(SX)         | Taiyuan      | N 37°57'6"<br>E 114°37'45"  | capsaicin  | 2 | mixed    | brown |
|                   |                        |              | N 37°57'25"<br>E 114°38'7"  | capsaicin  | 2 | mixed    | brown |
|                   |                        |              | N 40°43'20"<br>E 111°47'13" | capsaicin  | 3 | organic  | brown |
|                   |                        |              | N 40°42'48"<br>E 111°47'56" | capsaicin  | 3 | organic  | brown |
|                   |                        |              | N 40°42'10"<br>E 111°48'54" | capsaicin  | 3 | organic  | brown |
|                   |                        |              |                             |            |   |          |       |
|                   | Hebei<br>(HB)          | Shijiazhuang | N 36°54'26"<br>E 118°40'29" | bean       | 3 | mixed    | brown |
|                   |                        |              | N 36°52'46"<br>E 118°51'15" | bean       | 3 | mixed    | brown |
|                   |                        |              | N 36°48'47"<br>E 118°49'35" | bean       | 2 | mixed    | brown |
|                   |                        |              | N 31°26'14"<br>E 121°3'47"  | cabbage    | 3 | chemical | brown |
|                   |                        |              | N 31°16'16"<br>E 120°53'19" | cabbage    | 3 | chemical | brown |
|                   |                        |              | N 29°58'18"<br>E 122°15'23" | watermelon | 2 | chemical | brown |
| Eastern<br>China  | Inner Mongolia<br>(IM) | Hohhot       | N 29°59'16"<br>E 122°16'14" | watermelon | 2 | chemical | brown |
|                   |                        |              | N 30°03'8"<br>E 122°10'10"  | watermelon | 2 | chemical | brown |
|                   |                        |              | N 31°18'14"<br>E 121°14'26" | cabbage    | 3 | chemical | brown |
|                   |                        |              | N 31°16'3"                  | cabbage    | 3 | chemical | brown |
|                   |                        |              |                             |            |   |          |       |
|                   |                        |              |                             |            |   |          |       |
| Eastern<br>China  | Shandong<br>(SD)       | Shouguang    | N 36°54'26"<br>E 118°40'29" | bean       | 3 | mixed    | brown |
|                   |                        |              | N 36°52'46"<br>E 118°51'15" | bean       | 3 | mixed    | brown |
|                   |                        |              | N 36°48'47"<br>E 118°49'35" | bean       | 2 | mixed    | brown |
|                   |                        |              | N 31°26'14"<br>E 121°3'47"  | cabbage    | 3 | chemical | brown |
|                   |                        |              | N 31°16'16"<br>E 120°53'19" | cabbage    | 3 | chemical | brown |
|                   |                        |              | N 29°58'18"<br>E 122°15'23" | watermelon | 2 | chemical | brown |
|                   | Jiangsu<br>(JS)        | Suzhou       | N 29°59'16"<br>E 122°16'14" | watermelon | 2 | chemical | brown |
|                   |                        |              | N 30°03'8"<br>E 122°10'10"  | watermelon | 2 | chemical | brown |
|                   |                        |              | N 31°18'14"<br>E 121°14'26" | cabbage    | 3 | chemical | brown |
|                   |                        |              | N 31°16'3"                  | cabbage    | 3 | chemical | brown |
|                   |                        |              |                             |            |   |          |       |
|                   |                        |              |                             |            |   |          |       |
| Eastern<br>China  | Zhejiang<br>(ZJ)       | Zhoushan     | N 36°54'26"<br>E 118°40'29" | bean       | 3 | mixed    | brown |
|                   |                        |              | N 36°52'46"<br>E 118°51'15" | bean       | 3 | mixed    | brown |
|                   |                        |              | N 36°48'47"<br>E 118°49'35" | bean       | 2 | mixed    | brown |
|                   |                        |              | N 31°26'14"<br>E 121°3'47"  | cabbage    | 3 | chemical | brown |
|                   |                        |              | N 31°16'16"<br>E 120°53'19" | cabbage    | 3 | chemical | brown |
|                   |                        |              | N 29°58'18"<br>E 122°15'23" | watermelon | 2 | chemical | brown |
| Eastern<br>China  | Shanghai<br>(SH)       | Shanghai     | N 29°59'16"<br>E 122°16'14" | watermelon | 2 | chemical | brown |
|                   |                        |              | N 30°03'8"<br>E 122°10'10"  | watermelon | 2 | chemical | brown |
|                   |                        |              | N 31°18'14"<br>E 121°14'26" | cabbage    | 3 | chemical | brown |
|                   |                        |              | N 31°16'3"                  | cabbage    | 3 | chemical | brown |
|                   |                        |              |                             |            |   |          |       |
|                   |                        |              |                             |            |   |          |       |

|                        |                   |           |                                            |         |   |          |       |
|------------------------|-------------------|-----------|--------------------------------------------|---------|---|----------|-------|
| Central<br>China       | Hunan<br>(HN)     | Xiangtan  | E 121°15'8"<br>N 31°12'23"<br>E 121°12'43" | cabbage | 2 | chemical | brown |
|                        |                   |           | N 27°51'59"<br>E 112°49'45"                | cabbage | 2 | chemical | brown |
|                        |                   |           | N 27°51'56"<br>E 112°49'37"                | cabbage | 2 | chemical | brown |
|                        |                   |           | N 28°44'51"<br>E 115°54'55"                | bean    | 2 | mixed    | brown |
|                        | Jiangxi<br>(JX)   | Nanchang  | N 28°45'71"<br>E 115°56'09"                | bean    | 2 | mixed    | brown |
|                        |                   |           |                                            |         |   |          |       |
| Southern<br>China      | Guangdong<br>(GD) | Guangzhou | N 23°9'30"<br>E 113°22'26"                 | cabbage | 3 | mixed    | red   |
|                        |                   |           | N 23°12'35"<br>E 113°22'24"                | cabbage | 3 | mixed    | red   |
|                        |                   |           |                                            |         |   |          |       |
|                        |                   |           |                                            |         |   |          |       |
| Northweste<br>rn China | Gansu<br>(GS)     | Lanzhou   | N 36°08'10"<br>E 103°22'36"                | bean    | 3 | chemical | brown |
|                        |                   |           | N 35°29'19"<br>E 103°51'38"                | bean    | 3 | chemical | brown |
|                        |                   |           | N 36°44'14"<br>E 101°44'43"                | potato  | 3 | organic  | brown |
|                        |                   |           |                                            |         |   |          |       |
|                        | Qinghai<br>(QH)   | Xining    | N 36°59'11"<br>E 101°39'41"                | potato  | 3 | organic  | brown |
|                        |                   |           | N 36°58'36"<br>E 101°39'54"                | potato  | 2 | organic  | brown |
|                        |                   |           | N 87°45'46"<br>E 43°47'80"                 | tomato  | 2 | organic  | brown |
|                        |                   |           |                                            |         |   |          |       |
|                        | Xinjiang<br>(XJ)  | Urumqi    | N 87°41'78"<br>E 43°48'20"                 | tomato  | 2 | organic  | brown |
|                        |                   |           | N 87°38'39"<br>E 43°48'20"                 | tomato  | 2 | organic  | brown |
|                        |                   |           |                                            |         |   |          |       |
|                        |                   |           |                                            |         |   |          |       |
| Southweste<br>rn China | Yunnan<br>(YN)    | Kunming   | N 24°54'43"<br>E 102°44'52"                | cabbage | 2 | chemical | red   |
|                        |                   |           | N 24°47'40"<br>E 102°46'27"                | cabbage | 2 | chemical | red   |
|                        |                   |           | N 30°34'19"<br>E 104°09'25"                | cabbage | 2 | mixed    | brown |
|                        |                   |           |                                            |         |   |          |       |
|                        | Sichuan<br>(SC)   | Chengdu   | N 30°32'35"<br>E 104°00'22"                | cabbage | 2 | mixed    | brown |
|                        |                   |           | N 30°33'<br>E 104°08'26"                   | cabbage | 2 | mixed    | brown |
|                        |                   |           | N 29°40'16"<br>E 94°19'58"                 | tomato  | 2 | organic  | brown |
|                        |                   |           |                                            |         |   |          |       |
|                        | Tibet<br>(TB)     | Nyingchi  | N 29°37'6"<br>E 94°23'42"                  | tomato  | 2 | organic  | brown |
|                        |                   |           | N 29°42'32"<br>E 94°20'6"                  | tomato  | 2 | organic  | brown |
|                        |                   |           |                                            |         |   |          |       |
|                        |                   |           |                                            |         |   |          |       |

**Table S2.** The detected PCBs and their properties (Chemical book).

| Detected PCB | Molecular weight | Water solubility (25 °C) |
|--------------|------------------|--------------------------|
| PCB-28       | 257.54           | 116 µg/L                 |

|         |        |                   |
|---------|--------|-------------------|
| PCB-52  | 291.99 | 109 µg/L          |
| PCB-77  | 291.99 | 0.549 µg/L        |
| PCB-81  | 291.99 | -                 |
| PCB-101 | 326.43 | 11.0 µg/L         |
| PCB-105 | 326.43 | -                 |
| PCB-114 | 326.43 | 15.98 µg/L        |
| PCB-118 | 326.43 | 13.44 µg/L        |
| PCB-123 | 326.43 | -                 |
| PCB-126 | 326.43 | -                 |
| PCB-138 | 360.88 | 7.29 µg/L         |
| PCB-153 | 360.88 | 0.863 µg/L        |
| PCB-156 | 360.88 | 5.33 µg/L         |
| PCB-157 | 360.88 | -                 |
| PCB-167 | 360.88 | -                 |
| PCB-169 | 360.88 | -                 |
| PCB-180 | 395.32 | 3.85 µg/L (20 °C) |
| PCB-189 | 395.32 | -                 |

**Table S3.** Parameters for adults and children in the exposure risk assessment.

| Parameter  | Population | Value               | Reference     |
|------------|------------|---------------------|---------------|
| <i>IRS</i> | Adults     | 100                 | (USEPA, 2015) |
|            | Children   | 200                 |               |
| <i>EF</i>  | Adults     | 350                 | (USEPA, 2015) |
|            | Children   | 350                 |               |
| <i>ED</i>  | Adults     | 26                  | (USEPA, 2015) |
|            | Children   | 6                   |               |
| <i>BW</i>  | Adults     | 80                  | (USEPA, 2015) |
|            | Children   | 15                  |               |
| <i>AT</i>  | Adults     | 9490 (non-cancer)   | (USEPA, 2015) |
|            |            | 25550 (cancer)      |               |
|            | Children   | 2190 (non-cancer)   |               |
|            |            | 25550 (cancer)      |               |
| <i>IhR</i> | Adults     | 13.25 <sup>a</sup>  | (USEPA, 1997) |
|            | Children   | 12 <sup>b</sup>     |               |
| <i>PEF</i> | Adults     | 1.4×10 <sup>9</sup> | (USEPA, 2015) |
|            | Children   | 1.4×10 <sup>9</sup> |               |
| <i>SA</i>  | Adults     | 6032                | (USEPA, 2015) |
|            | Children   | 2373                |               |
| <i>AF</i>  | Adults     | 0.07                | (USEPA, 2015) |
|            | Children   | 0.2                 |               |

<sup>a</sup> The mean for male and female adults; <sup>b</sup> The mean for different ages of children.

**Table S4.** Parameters associated with different pollutants in the exposure risk assessment.

| Compound | <i>ABS</i> <sup>a</sup> |                         |                          |                          |           | <i>ABS<sub>GI</sub></i> <sup>a</sup> |
|----------|-------------------------|-------------------------|--------------------------|--------------------------|-----------|--------------------------------------|
|          | <i>SFO</i> <sup>a</sup> | <i>IUR</i> <sup>a</sup> | <i>RfDo</i> <sup>a</sup> | <i>RfCi</i> <sup>a</sup> |           |                                      |
| PCB-189  | 0.14                    | 3.9                     | 1.1                      | 0.000023                 | 0.0013    | 1                                    |
| PCB-169  | 0.14                    | 3900                    | 1100                     | 0.000000023              | 0.0000013 | 1                                    |
| PCB-167  | 0.14                    | 3.9.                    | 1.1                      | 0.000023                 | 0.0013    | 1                                    |

|         |      |       |       |             |           |   |
|---------|------|-------|-------|-------------|-----------|---|
| PCB-157 | 0.14 | 3.9   | 1.1   | 0.000023    | 0.0013    | 1 |
| PCB-156 | 0.14 | 3.9   | 1.1   | 0.000023    | 0.0013    | 1 |
| PCB-126 | 0.14 | 13000 | 3800  | 0.000000007 | 0.0000004 | 1 |
| PCB-123 | 0.14 | 3.9   | 1.1   | 0.000023    | 0.0013    | 1 |
| PCB-118 | 0.14 | 3.9   | 1.1   | 0.000023    | 0.0013    | 1 |
| PCB-114 | 0.14 | 3.9   | 1.1   | 0.000023    | 0.0013    | 1 |
| PCB-105 | 0.14 | 3.9   | 1.1   | 0.000023    | 0.0013    | 1 |
| PCB-77  | 0.14 | 13    | 3.8   | 0.000007    | 0.0004    | 1 |
| PCB-81  | 0.14 | 39    | 110   | 0.0000023   | 0.00013   | 1 |
| HCB     | —    | 0.078 | 0.022 | 0.001       | —         | 1 |

<sup>a</sup> The parameters are recommend by the USEPA (2015).

**Table S5.** Means comparisons of PCBs and HCBd concentrations in greenhouse and open-field soils.

|                     | MeanDiff  | SEM     | t value | Prob   | Alpha  | Sig | LCL      | UCL    |
|---------------------|-----------|---------|---------|--------|--------|-----|----------|--------|
| PCBs-G vs<br>PCBs-O | -13.10635 | 11.0880 | -1.1820 | 0.2400 | 0.0500 | 0   | -35.1046 | 8.8919 |
| HCBd-G vs<br>HCBd-O | -1.9370   | 1.0564  | -1.8336 | 0.0697 | 0.0500 | 0   | -4.0329  | 0.1588 |

Note: G represent greenhouse; O represent open-field; Sig equal 1 indicates that the difference of the means is significant at the 0.05 level; Sig equal 0 indicates that the difference of the means is not significant at the 0.05 level.

**Table S6.** Correlation coefficients among the PCB homologue group and soil properties in greenhouse soils of north China.

|           | Tri-CBs | Tetra-CBs | Penta-CBs | Hexa-CBs | Hepta-CBs | ΣPCBs          | pH     | STN            | STP    | STC            | SM            |
|-----------|---------|-----------|-----------|----------|-----------|----------------|--------|----------------|--------|----------------|---------------|
| Tri-CBs   | 1.000   | -0.151    | 0.303     | 0.225    | 0.303     | 0.093          | 0.208  | -0.468         | -0.035 | <b>-0.676*</b> | 0.156         |
| Tetra-CBs |         | 1.000     | 0.028     | 0.351    | 0.129     | <b>0.907**</b> | -0.164 | -0.314         | 0.251  | -0.091         | 0.114         |
| Penta-CBs |         |           | 1.000     | 0.037    | -0.087    | 0.174          | 0.367  | <b>-0.661*</b> | 0.138  | -0.303         | 0.294         |
| Hexa-CBs  |         |           |           | 1.000    | 0.439     | <b>0.609*</b>  | 0.209  | -0.491         | -0.482 | <b>-0.727*</b> | -0.164        |
| Hepta-CBs |         |           |           |          | 1.000     | 0.210          | 0.029  | -0.114         | -0.582 | -0.182         | -0.477        |
| ΣPCBs     |         |           |           |          |           | 1.000          | 0.055  | -0.527         | 0.064  | -0.391         | 0.118         |
| pH        |         |           |           |          |           |                | 1.000  | -0.382         | -0.209 | -0.209         | 0.245         |
| STN       |         |           |           |          |           |                |        | 1.000          | -0.118 | <b>0.655*</b>  | -0.127        |
| STP       |         |           |           |          |           |                |        |                | 1.000  | 0.309          | <b>0.718*</b> |
| STC       |         |           |           |          |           |                |        |                |        | 1.000          | 0.100         |
| SM        |         |           |           |          |           |                |        |                |        |                | 1.000         |

**Table S7.** Correlation coefficients among the PCB homologue group and soil properties in open-field soils of north China.

|           | Tri-CBs | Tetra-CBs | Penta-CBs | Hexa-CBs       | Hepta-CBs     | ΣPCBs          | pH             | STN    | STP    | STC            | SM     |
|-----------|---------|-----------|-----------|----------------|---------------|----------------|----------------|--------|--------|----------------|--------|
| Tri-CBs   | 1.000   | 0.137     | -0.030    | -0.049         | 0.061         | 0.363          | <b>-0.645*</b> | -0.200 | 0.553  | -0.124         | 0.400  |
| Tetra-CBs |         | 1.000     | 0.307     | <b>0.760**</b> | 0.394         | <b>0.830**</b> | -0.154         | 0.140  | 0.572  | -0.005         | -0.107 |
| Penta-CBs |         |           | 1.000     | <b>0.761**</b> | <b>0.631*</b> | <b>0.688*</b>  | 0.282          | 0.238  | 0.124  | -0.296         | -0.477 |
| Hexa-CBs  |         |           |           | 1.000          | 0.438         | <b>0.881**</b> | 0.040          | 0.428  | 0.298  | 0.014          | -0.521 |
| Hepta-CBs |         |           |           |                | 1.000         | 0.516          | 0.151          | -0.017 | 0.295  | -0.225         | -0.341 |
| ΣPCBs     |         |           |           |                |               | 1.000          | -0.160         | 0.182  | 0.601  | -0.146         | -0.219 |
| pH        |         |           |           |                |               |                | 1.000          | -0.451 | -0.446 | -0.551         | -0.155 |
| STN       |         |           |           |                |               |                |                | 1.000  | 0.082  | <b>0.755**</b> | -0.500 |
| STP       |         |           |           |                |               |                |                |        | 1.000  | 0.209          | 0.109  |
| STC       |         |           |           |                |               |                |                |        |        | 1.000          | -0.427 |
| SM        |         |           |           |                |               |                |                |        |        |                | 1.000  |

**Table S8.** Correlation coefficients among the PCB homologue group and soil properties in greenhouse soils of east China.
